# Supplementary material
Source: PubMed Central journal article supplement (PMC3563417)
Supplement: 97320630009054S1.pdf [file 97320630009054S1.pdf]

## Supplementary material:

**Table 1:** Top ten compounds against NS2B protein [The amino acids are represented by their one letter code]

| Rank | PubChem ID | Molecular formula                                | M.W. (g/mol) | LogP value | Energy Score (kcal/mol) | No. of H-bonds; hydrophobic contacts | Inhibitor constant $K_i$ (nM) at 298.15 K |
|------|------------|--------------------------------------------------|--------------|------------|-------------------------|--------------------------------------|-------------------------------------------|
| 1    | 636530     | C <sub>25</sub> H <sub>28</sub> O <sub>4</sub>   | 392.487      | 5.6        | -9.95                   | 2(G80,D81);10                        | 51.07                                     |
| 2    | 45280006   | C <sub>25</sub> H <sub>28</sub> O <sub>4</sub>   | 392.487      | 5.6        | -9.94                   | 0; 10                                | 51.36                                     |
| 3    | 21858822   | C <sub>20</sub> H <sub>16</sub> O <sub>5</sub>   | 336.338      | 3.5        | -9.89                   | 2(G80,T108);10                       | 56.11                                     |
| 4    | 6476085    | C <sub>20</sub> H <sub>20</sub> O <sub>5</sub>   | 340.369      | 4.1        | -8.78                   | 1(C101);7                            | 363.76                                    |
| 5    | 57175290   | C <sub>19</sub> H <sub>20</sub> O <sub>3</sub>   | 296.360      | 3.6        | -8.63                   | 1(C101);9                            | 473.63                                    |
| 6    | 20763922   | C <sub>20</sub> H <sub>20</sub> O <sub>4</sub>   | 324.370      | 4.6        | -8.53                   | 2(C101,L104);9                       | 561.78                                    |
| 7    | 23069388   | C <sub>16</sub> H <sub>16</sub> O <sub>4</sub>   | 272.295      | 3.9        | -8.45                   | 2(Y119,C101);9                       | 635.33                                    |
| 8    | 22673586   | C <sub>15</sub> H <sub>15</sub> O <sub>8</sub> P | 354.248      | 1.6        | -8.40                   | 2(D81,C101);8                        | 691.03                                    |
| 9    | 2733750    | C <sub>17</sub> H <sub>18</sub> O <sub>3</sub>   | 270.323      | 4.8        | -8.40                   | 1(C101);8                            | 693.75                                    |
| 10   | 22673906   | C <sub>15</sub> H <sub>15</sub> O <sub>8</sub> P | 354.248      | 1.6        | -8.39                   | 2(C101,L104);9                       | 709.72                                    |
